# Supplementary material for: A High-Content Screening Assay for the Discovery of Novel Proteasome Inhibitors from Formosan Soft Corals
Source: PubMed Central journal article supplement (PMC6213913; doi:10.3390/md16100395), 2018-10-21
Supplement: marinedrugs-16-00395-s001.pdf [file marinedrugs-16-00395-s001.pdf]

**Table 1S.** Evaluation of ED<sub>50</sub> cytotoxicity of tested compounds against HEK293T cells

| Compound                             | <i>M</i> (g/mol) | Nuclear count         | MTT assay  |
|--------------------------------------|------------------|-----------------------|------------|
| Bortezomib                           | 384.243          | 13.1 nM               | 7.76 nM    |
| MG132                                | 475.630          | 0.97 μM               | 1.65 μM    |
| <i>Clasto</i> -lactacystin β-lactone | 213.23           | > 10 μM               | > 10 μM    |
| Sarcophytonin A (1)                  | 286.459          | > 25 μg/ml (87.27 μM) | > 25 μg/ml |
| Sarcophytoxide (2)                   | 302.458          | > 25 μg/ml (82.66 μM) | > 25 μg/ml |
| Sarcophine (3)                       | 316.441          | > 25 μg/ml (79.00 μM) | > 25 μg/ml |
| Laevigatol A (4)                     | 334.456          | > 25 μg/ml (74.75 μM) | > 25 μg/ml |

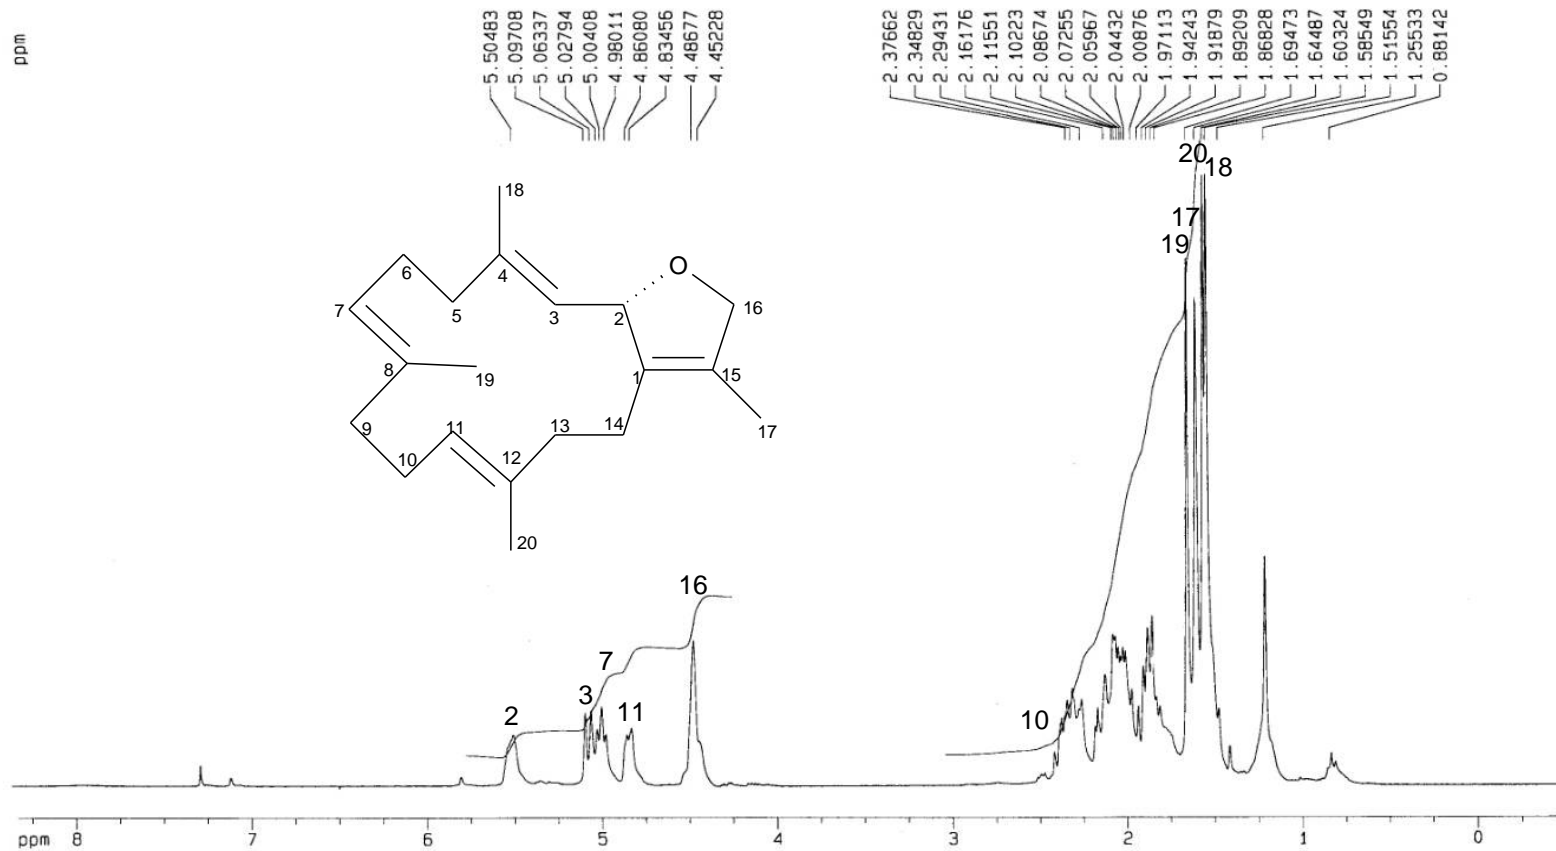

Sarcophytonin A (1)

PHII03-10-2-6-3-H5 in CDCl3

Sample Name:  
PHII03-10-2-6-3-H5  
Data Collected on:  
Varian-NMR-vnmrs400  
Archive directory:  
/home/duh/vnmrsys/data  
Sample directory:  
PHII03-10-2-6-3-H5\_20141019\_01  
FidFile: PROTON\_01

Pulse Sequence: PROTON (s2pul)  
Solvent: cdcl3  
Data collected on: Oct 19 2014

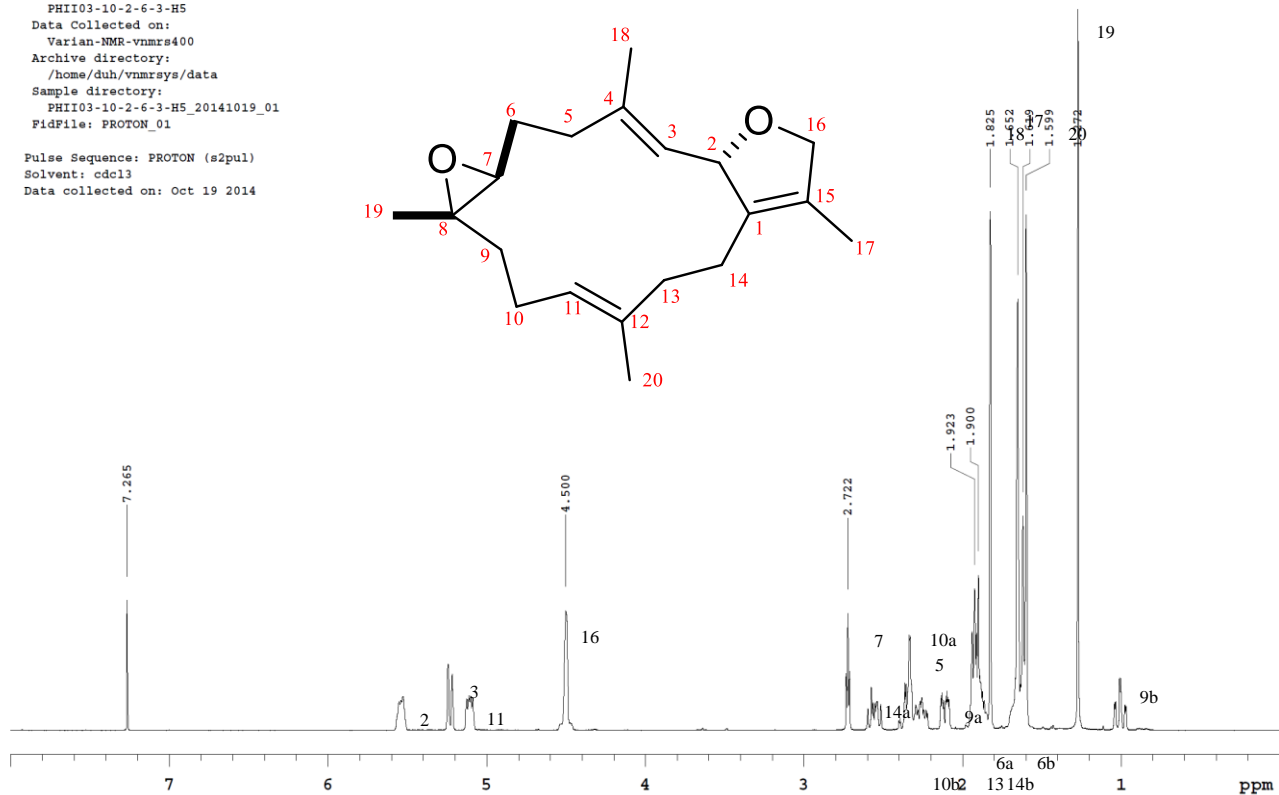

Sarcophytoside (2)

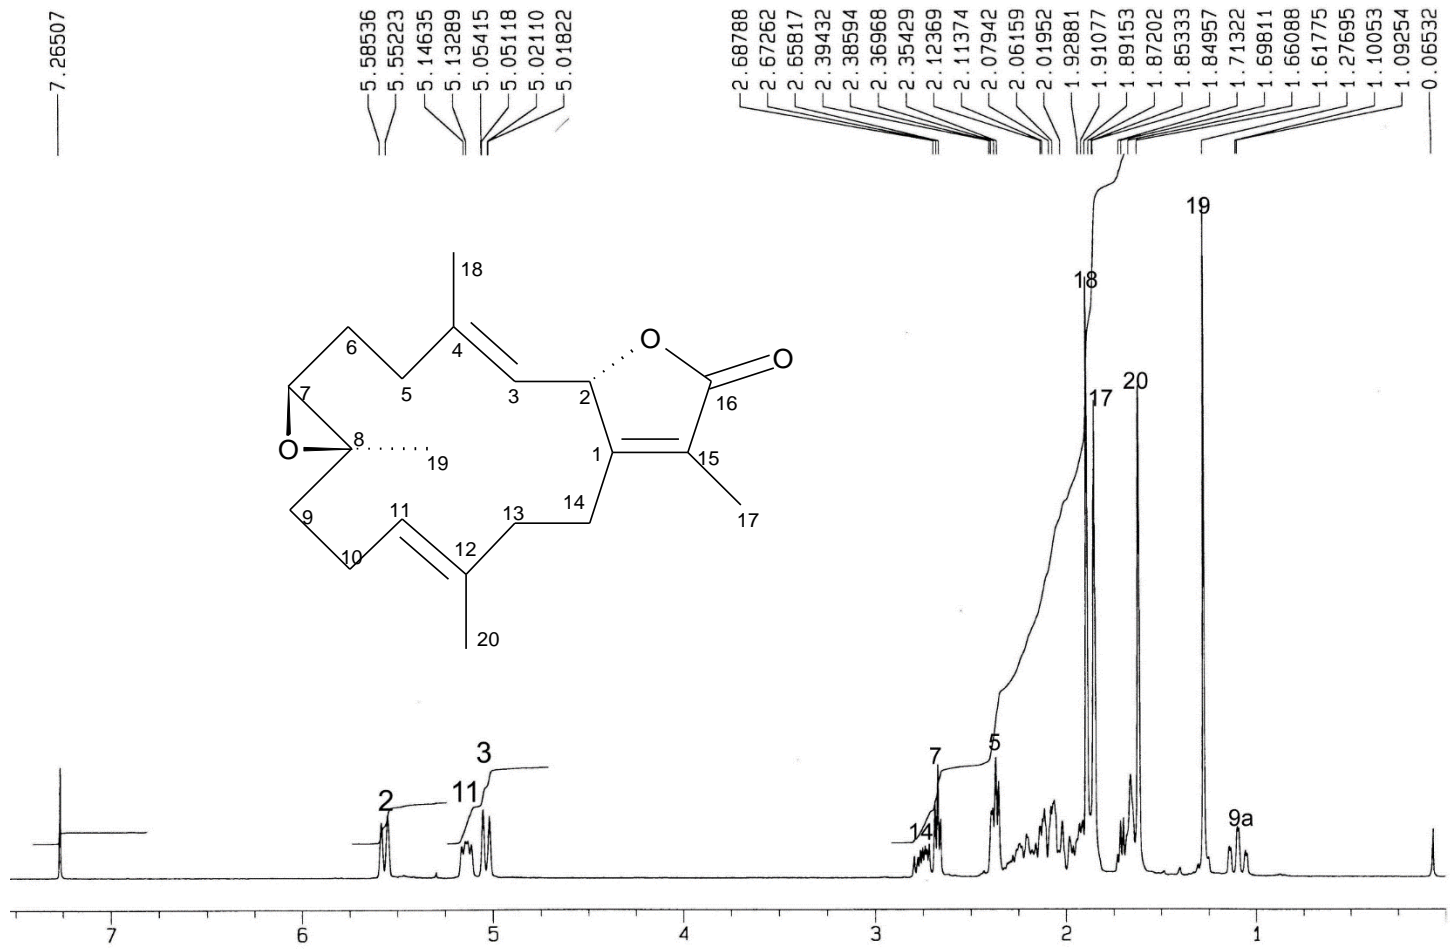

Sarcophine (3)

PHII03-14-2-5-H5

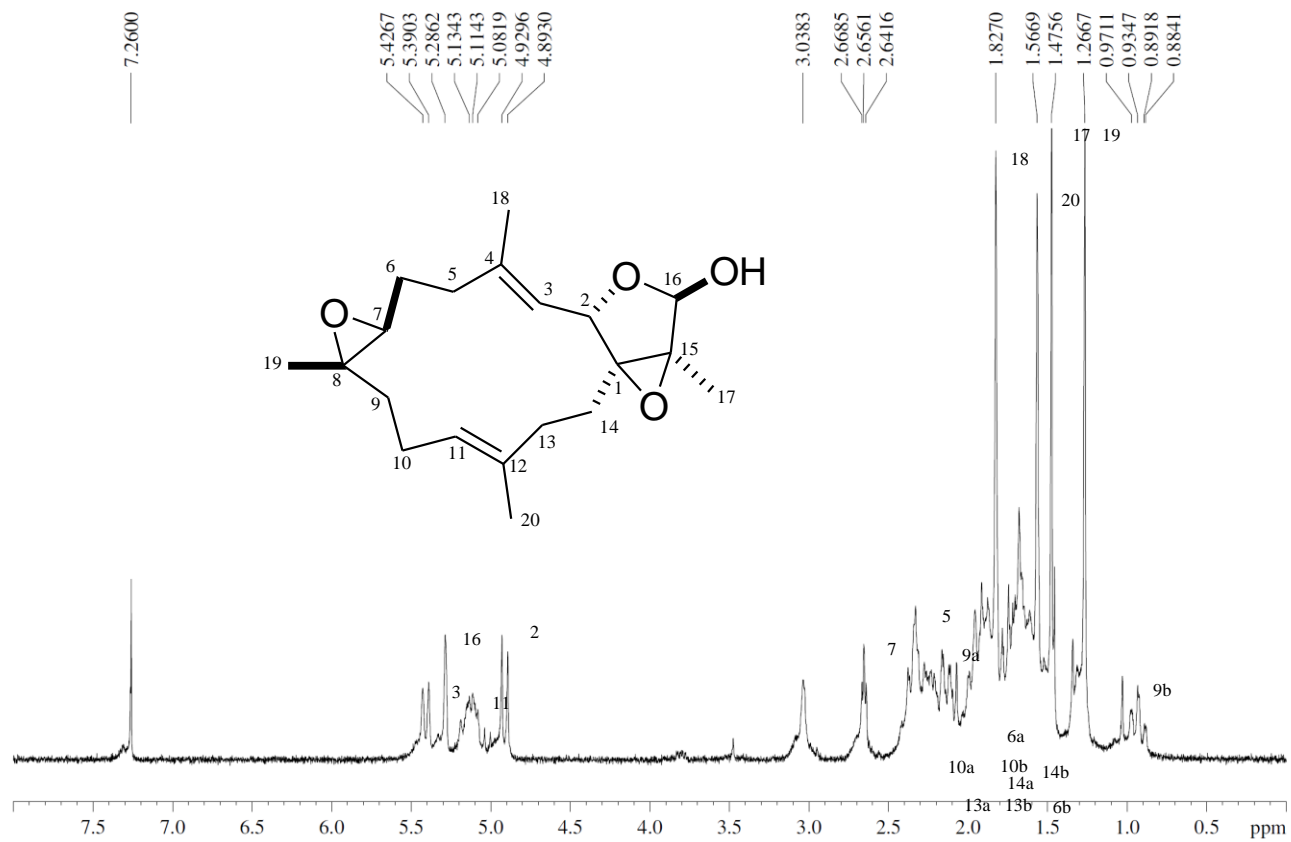

Laevigatol A (4)
